# Supplementary material for: Interfacial supramolecular cyclodextrin-fullerene assemblies: host reorientation and guest stabilization
Source: Royal Society of Chemistry journal article supplement (doi:10.1039/b810772f), 2008-12-02
Supplement: b810772f.pdf [file b810772f.pdf]

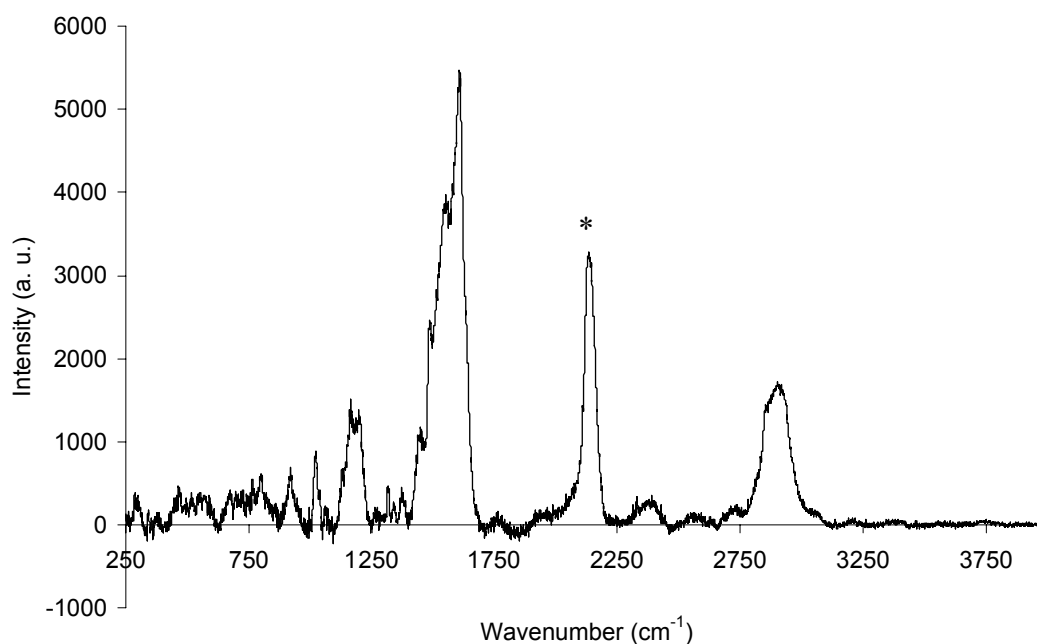

**Figure 1S** SERS of Maltose thin film on electrochemically roughened Au electrode. Excitation 632.8 nm, the feature marked \* does not appear in the solution or solid Raman spectrum of maltose.

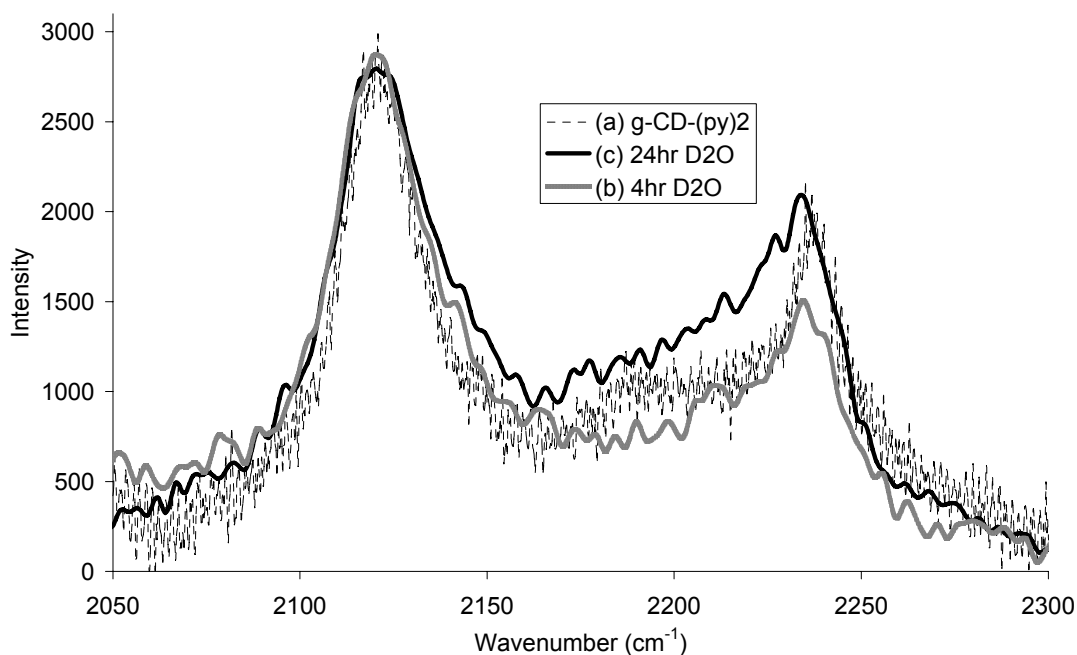

**Figure 2S** SERS of (a)  $\gamma$ -CD-(Py)<sub>2</sub> after 24 hr formation (on electrochemically roughened Au electrode). (b)  $\gamma$ -CD-(Py)<sub>2</sub> monolayer after 4 hr exposure to D<sub>2</sub>O and (c) 24 hr exposure to D<sub>2</sub>O. Excitation 632.8 nm

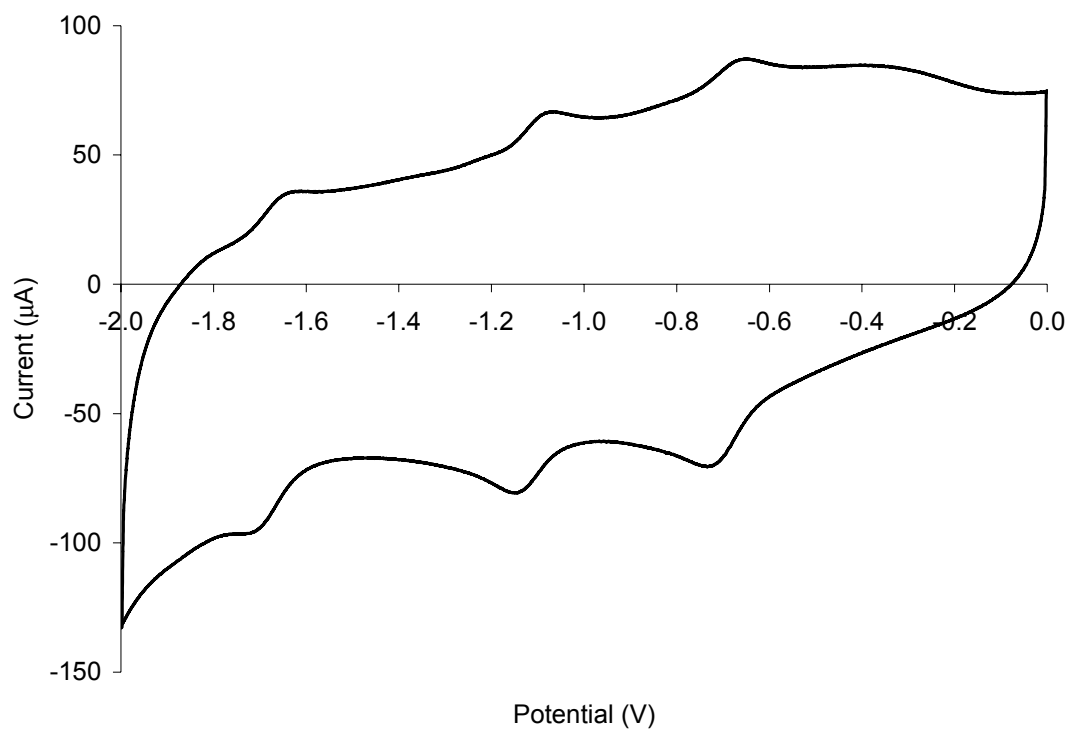

**Figure 3S** Cyclic voltammetry of solution phase  $[\gamma\text{-CD}]_2\text{:C}_{60}$  in DMF, with 0.2 M  $\text{LiClO}_4$  electrolyte, glassy carbon working electrode,  $\text{Ag}/\text{Ag}^+$  reference and Pt wire auxiliary electrode. Scan rate = 0.5 V/s.

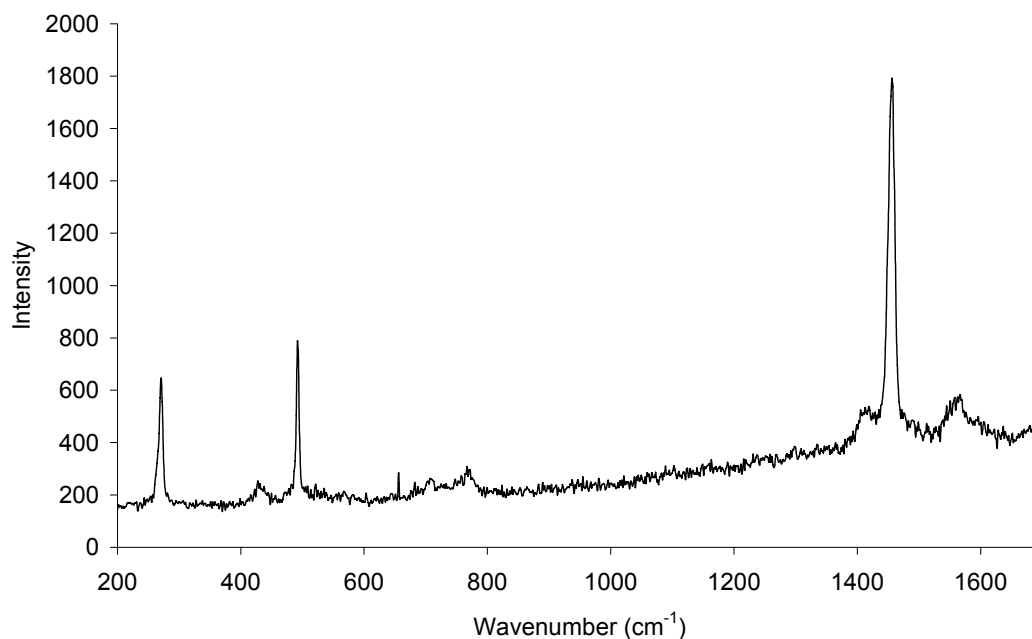

**Figure 4S** Raman of C<sub>60</sub> solid showing photopolymerisation using 488 nm excitation

|                 | Layer (cm <sup>-1</sup> )                                                                                                                                                                                                              | Bilayer (Backfilled $\gamma$ -CD-(py) <sub>2</sub> ) (cm <sup>-1</sup> )                                                                                                                                                              | Layer containing C <sub>60</sub> (cm <sup>-1</sup> )                                                                                                                                 |
|-----------------|----------------------------------------------------------------------------------------------------------------------------------------------------------------------------------------------------------------------------------------|---------------------------------------------------------------------------------------------------------------------------------------------------------------------------------------------------------------------------------------|--------------------------------------------------------------------------------------------------------------------------------------------------------------------------------------|
| Nonanethiol     | 381, 467, 484, 595, 680 (S) 695, 748, 834 (S), 850, 926, 954 (S), 1006 (S), 1034, 1107 (S), 1121, 1135, 1141, 1162, 1197 (S), 1212, 1277, 1308, 1342 (S), 1362, 1411, 1432, 1453, 1496, 1517, 1532, 1893, 2289, 2495, 2683, 2865-2945. | 337, 467, 482, 592, 677 (S), 691, 746, 831 (S), 848, 921, 952 (S), 1104, 1033, 1105, 1120, 1139, 1160, 1195 (S), 1211, 1273, 1305, 1338 (S), 1359, 1371, 1411, 1428, 1452 (S), 1493, 1888, 2284, 2497, 2647, 2674, 2721, 2865 - 2945. | 456, 492, 598, 683, 749, 837, 854, 926, 956, 1010, 1025, 1109, 1124, 1139, 1142, 1165, 1195, 1218, 1277, 1308, 1340, 1363, 1375, 1417, 1496, 1518, 1531, 1894, 2290, 2489, 2679-3020 |
| Pyridine        | 634, 1022, 1071, 1214, 1609                                                                                                                                                                                                            | 637, 1032, 1073, 1210, 1607.                                                                                                                                                                                                          | 1035, 1063, 1219, 1607.                                                                                                                                                              |
| CD              | 293, 395, 980, 1342, 1381, 1434, 1486, 1541, 2133, 2242, 2862 - 3128.                                                                                                                                                                  | 273, 298, 381, 970, 986, 1495, 1528, 1632, 2832 - 3117                                                                                                                                                                                | 261, 278, 293, 346, 383, 494, 651, 715, 894, <b>1063, 1187, 1230</b> , 1488, <b>1566</b> , 1637, 2766, 2700 - 3370.                                                                  |
| C <sub>60</sub> | 271, 1456                                                                                                                                                                                                                              |                                                                                                                                                                                                                                       | <b>492, 1470</b>                                                                                                                                                                     |

Table S1. List of list of major bands in the spectra in Figure 4 which can be assigned to the various species: pyridine, CD, nonanethiol, and C<sub>60</sub>. Vibrations in bold are new bands associated with inclusion of C<sub>60</sub> into the monolayer.
